# Supplementary material for: Tungsten-substituted molybdophosphoric acid impregnated with kaolin: effective catalysts for the synthesis of 3,4-dihydropyrimidin-2(1H)-ones via biginelli reaction
Source: Royal Society of Chemistry journal article supplement (doi:10.1039/d0ra09811f), 2021-01-01
Supplement: d0ra09811f1.pdf [file d0ra09811f1.pdf]

## Supporting Information

---

### Table of Contents

---

**S1. ICP-AES analysis**

**S2. EDS analysis**

**S3. BET analysis**

**S4. Melting Point of Synthesized Compounds**

**S5. Spectral data of the compounds**

**S6. FT-IR,  $^1\text{H}$  and  $^{13}\text{C}$  NMR spectra of the compounds.**

## S1. ICP-AES analysis.

Observed data (PPM):

| Element | PPM      | Atomic ratio |
|---------|----------|--------------|
| P       | 65.274   | 1.05         |
| Mo      | 1276.227 | 6.68         |
| W       | 1907.004 | 5.18         |

## S2. EDS analysis

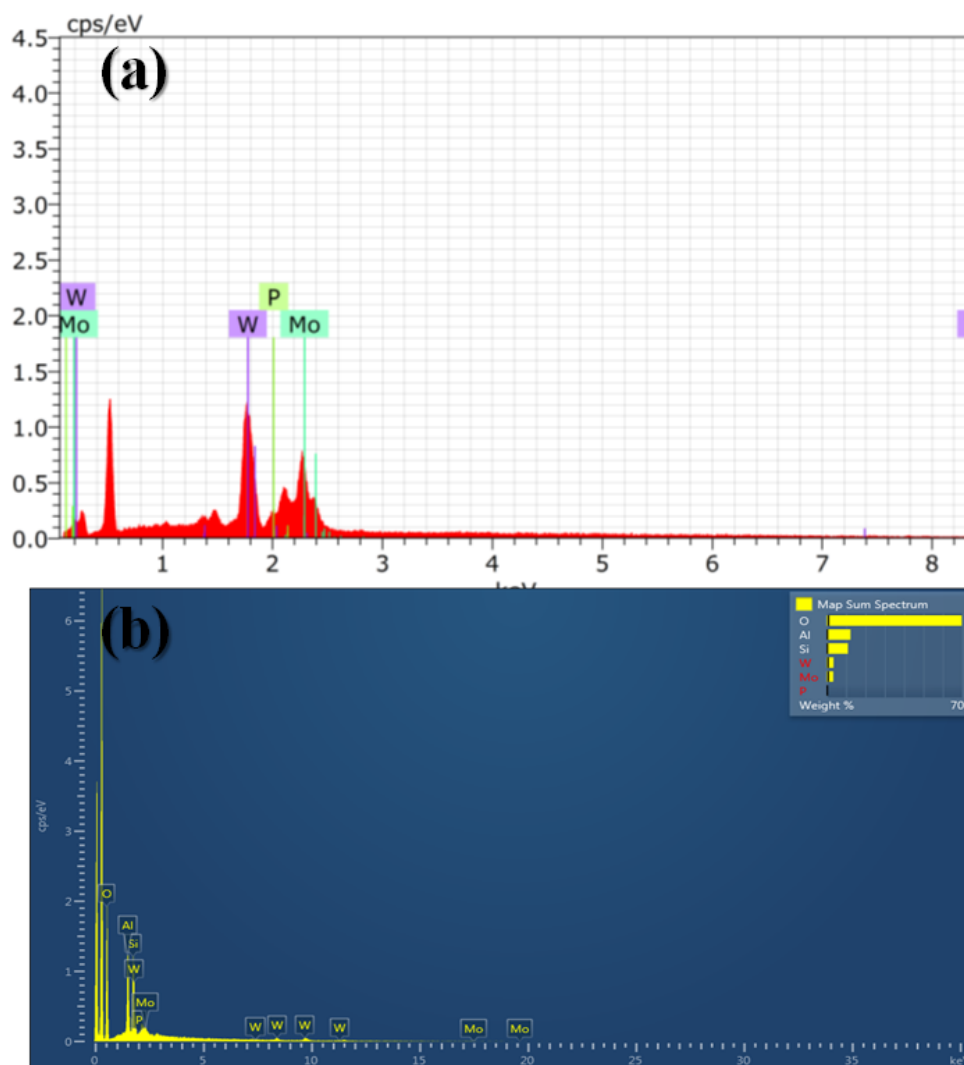

**Figure 1.** EDS images of (a) bulk PMo<sub>7</sub>W<sub>5</sub> (b) 20% PMo<sub>7</sub>W<sub>5</sub>/Kaolin.

### S3. BET analysis

#### (a) Bulk $\text{PMo}_7\text{W}_5$

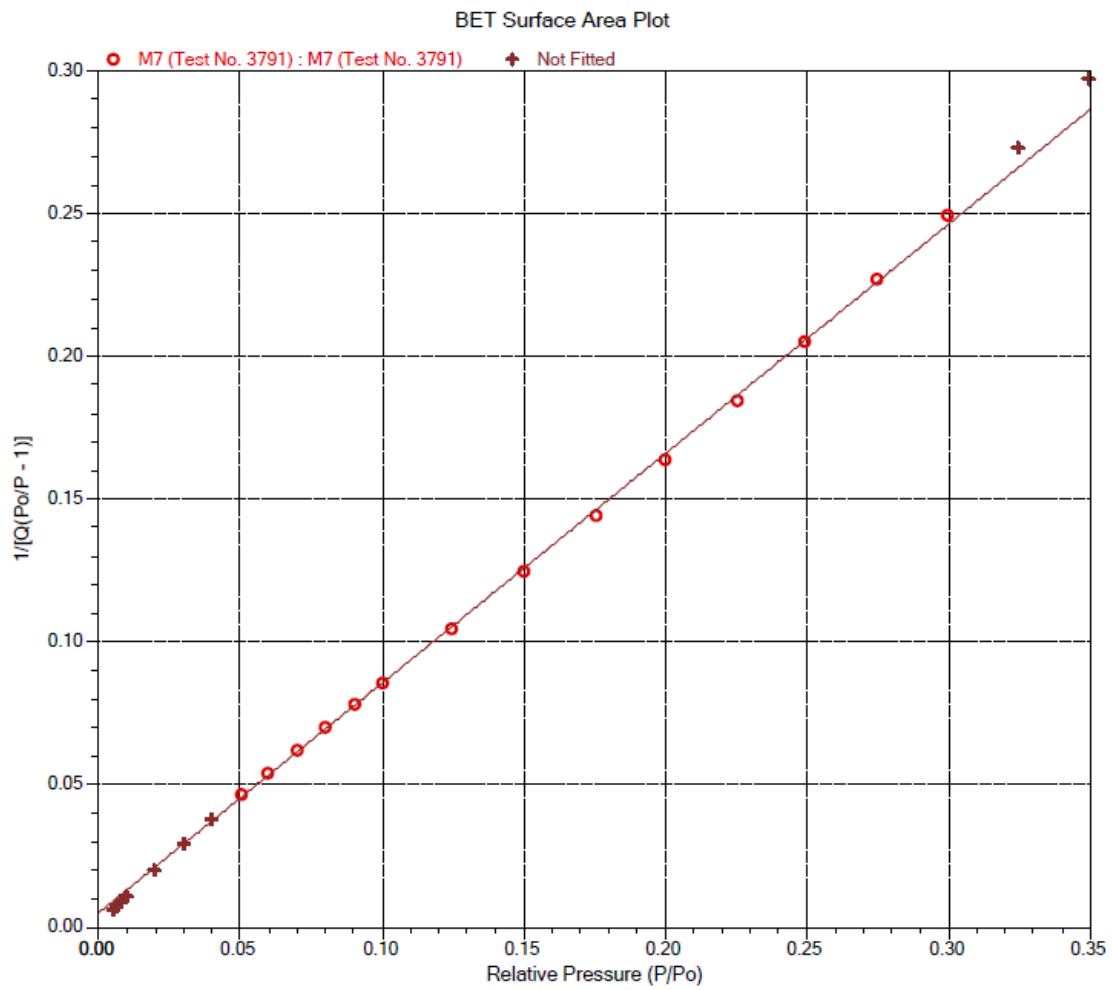

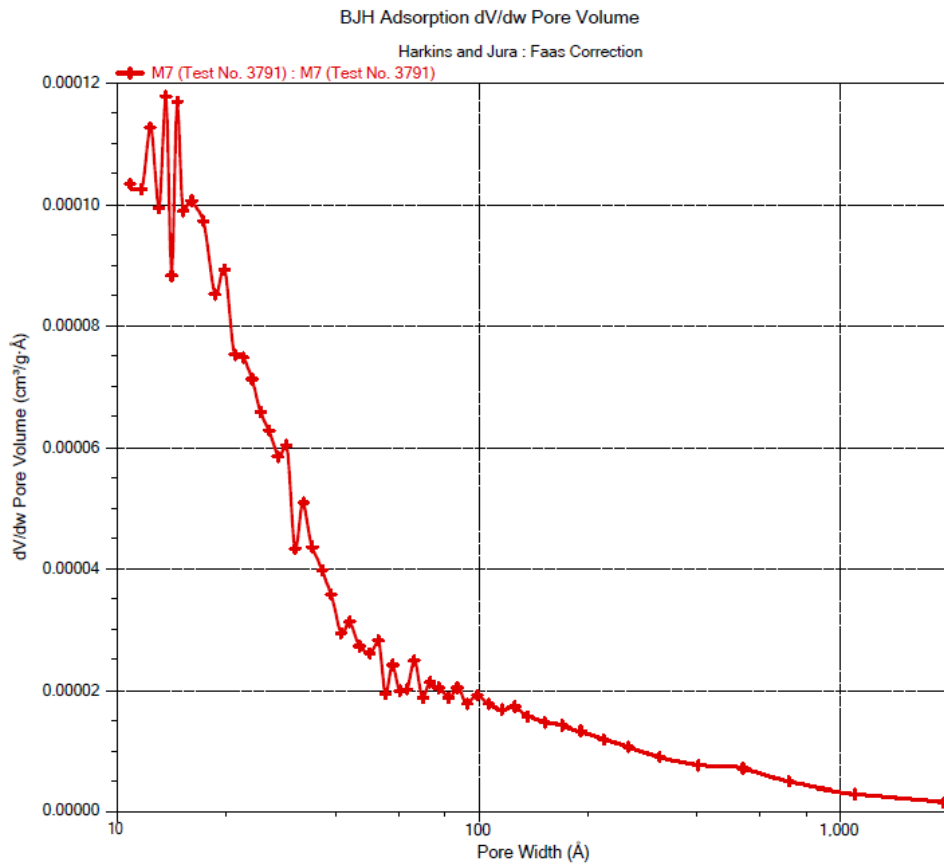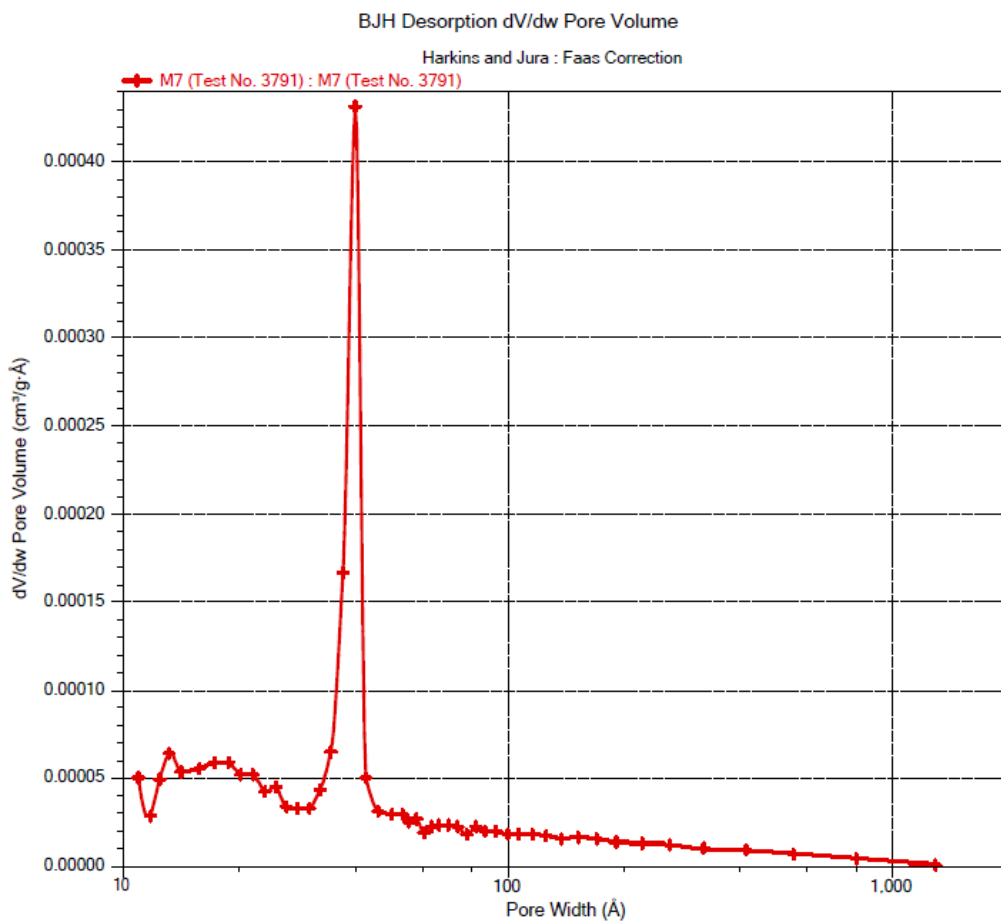

(b) Pure Karolin clay

**Multi-Point BET Plot**

| Adsorbate model |                    | Data Reduction Parameters |                       |                 |            |
|-----------------|--------------------|---------------------------|-----------------------|-----------------|------------|
| Nitrogen        | Molec. Wt.: 28.013 | Temperature               | 77.350K               | Liquid Density: | 0.808 g/cc |
|                 |                    | Cross Section:            | 16.200 Å <sup>2</sup> |                 |            |

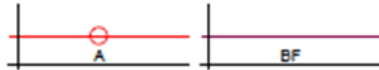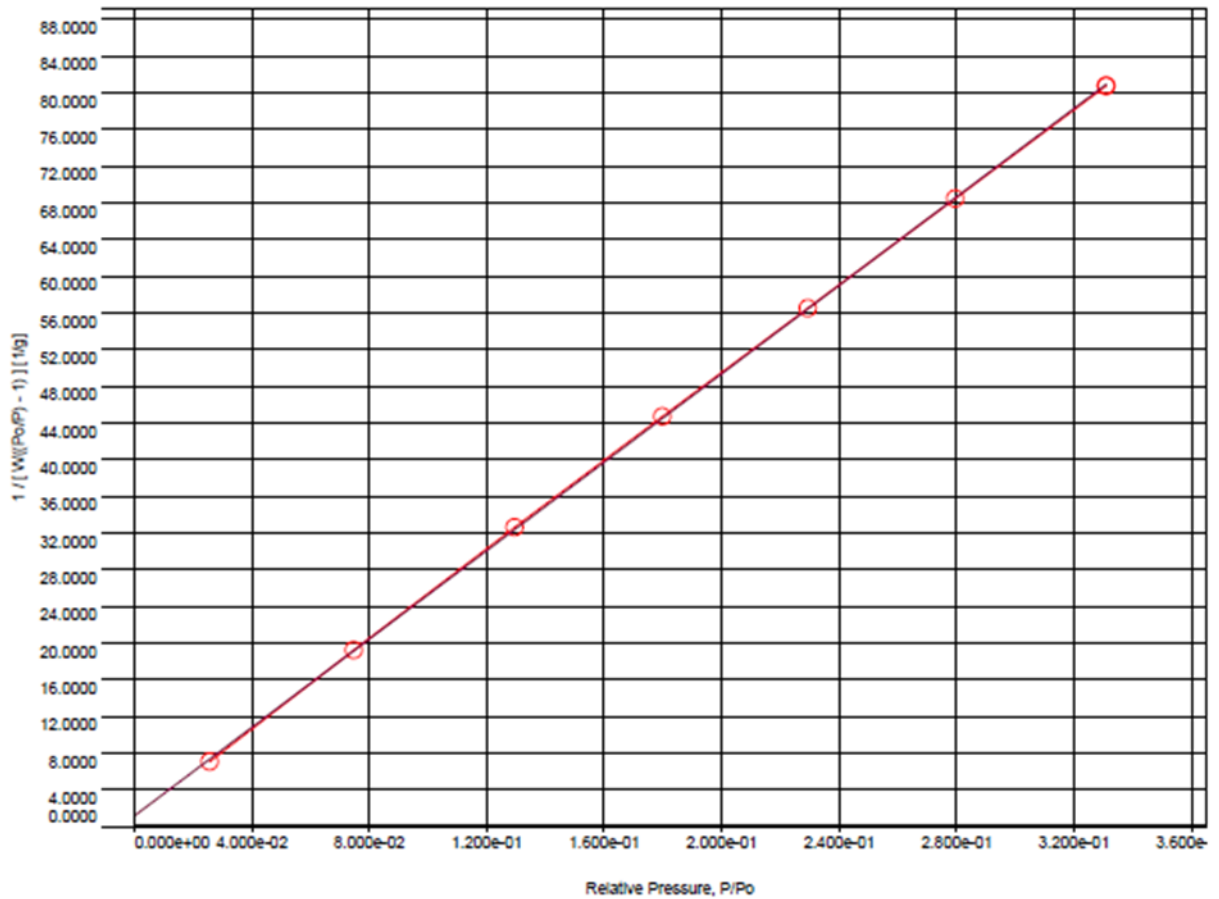

| BET summary                  |                          |
|------------------------------|--------------------------|
| Slope =                      | 240.999 1/g              |
| Intercept =                  | 1.150e+00 1/g            |
| Correlation coefficient, r = | 0.999972                 |
| C constant =                 | 210.531                  |
| Surface Area =               | 14.382 m <sup>2</sup> /g |

## BJH method Desorption dV(d)

| Data Reduction Parameters |                       |                 |                       |
|---------------------------|-----------------------|-----------------|-----------------------|
| <b>t-Method</b>           | Calc. method: de Boer | Temperature     | 77.350K               |
| <b>BJH/DH method</b>      | Moving pt. avg.: off  | Cross Section:  | 16.200 Å <sup>2</sup> |
| <b>Adsorbate model</b>    | Nitrogen              | Liquid Density: | 0.808 g/cc            |
|                           | Molec. Wt.: 28.013    |                 |                       |

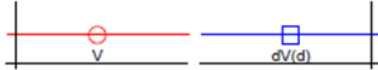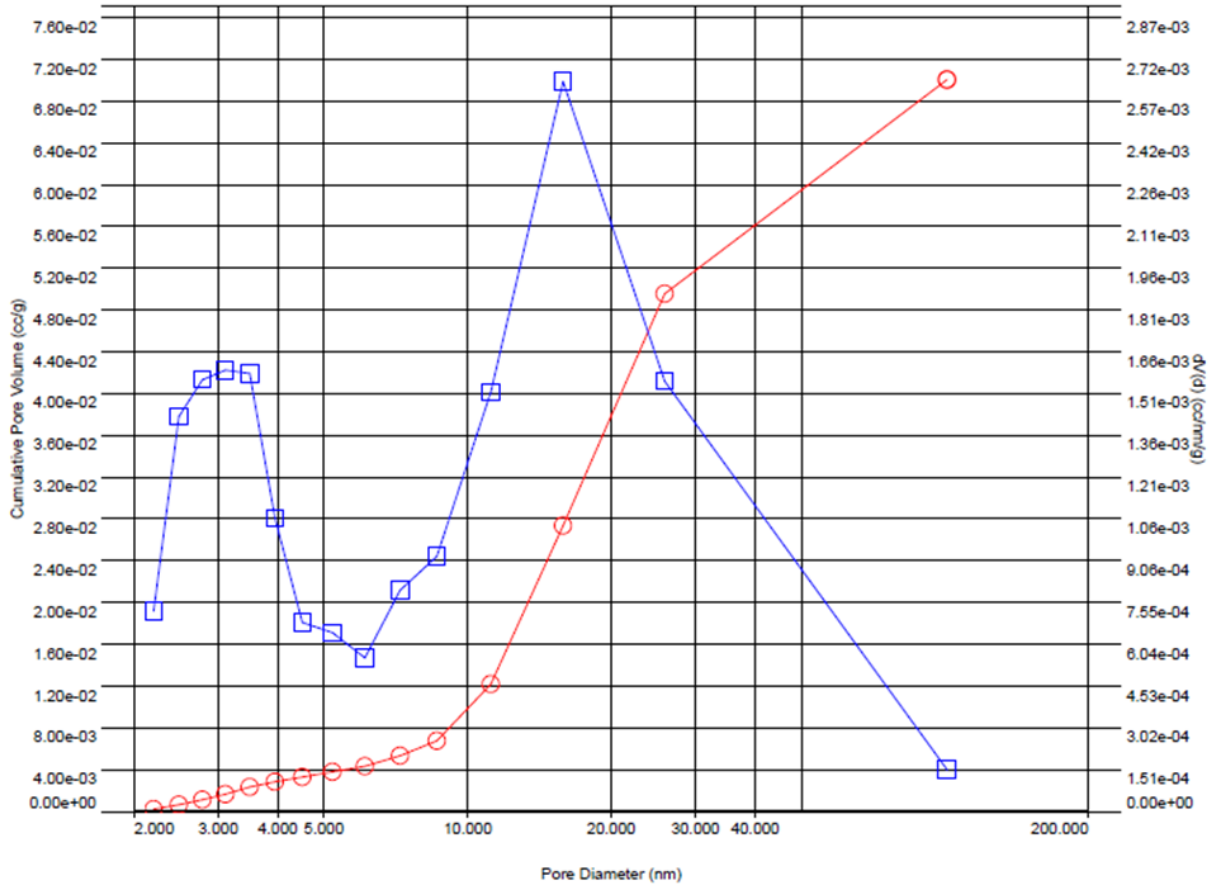

| <b>BJH desorption summary</b> |                          |
|-------------------------------|--------------------------|
| Surface Area =                | 16.093 m <sup>2</sup> /g |
| Pore Volume =                 | 0.070 cc/g               |
| Pore Diameter Dv(d) =         | 15.850 nm                |

(c) 20% PM<sub>07</sub>W<sub>5</sub>/Kaolin.

Cell ID: 4

**Multi-Point BET Plot**

| Adsorbate model |                    | Data Reduction Parameters |                       |                            |
|-----------------|--------------------|---------------------------|-----------------------|----------------------------|
| Nitrogen        | Molec. Wt.: 28.013 | Temperature               | 77.350K               | Liquid Density: 0.808 g/cc |
|                 |                    | Cross Section:            | 16.200 Å <sup>2</sup> |                            |

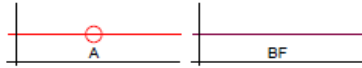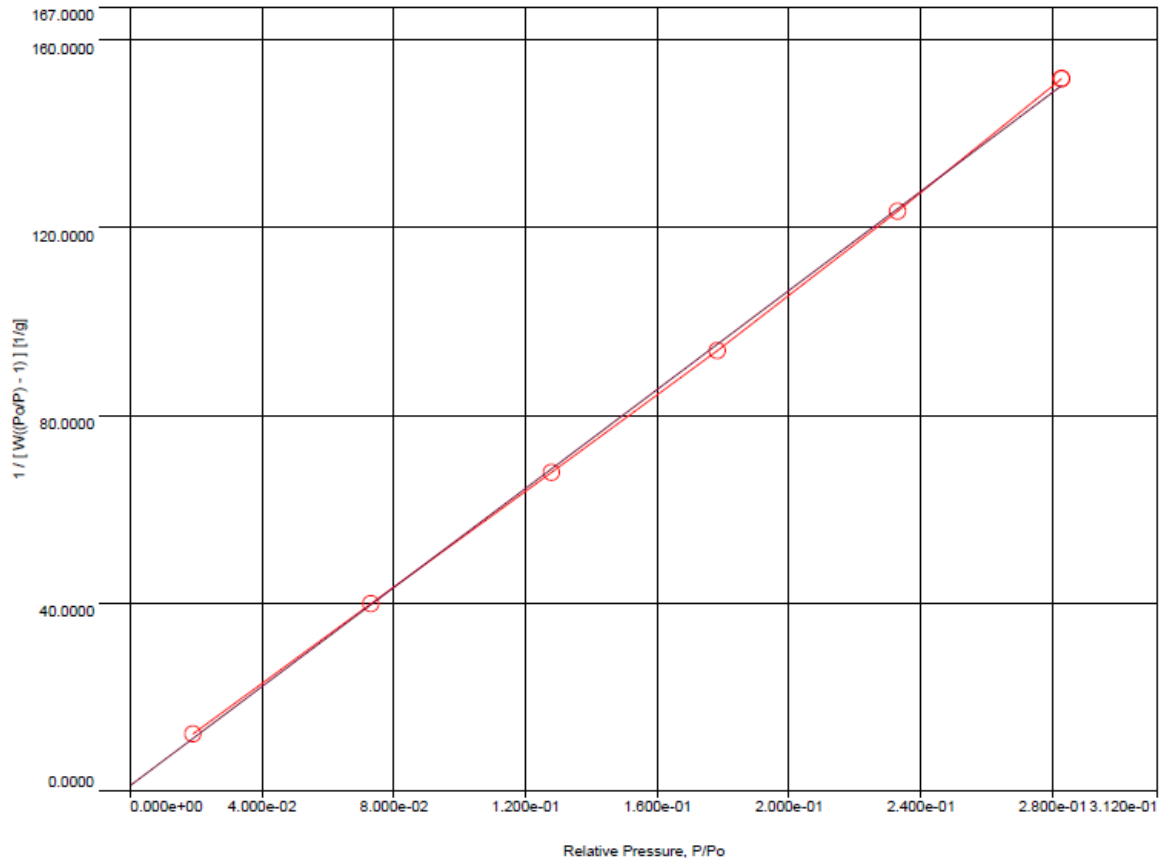

| <b>BET summary</b>           |                         |
|------------------------------|-------------------------|
| Slope =                      | 527.346 1/g             |
| Intercept =                  | 1.159e+00 1/g           |
| Correlation coefficient, r = | 0.999793                |
| C constant =                 | 456.148                 |
| Surface Area =               | 6.589 m <sup>2</sup> /g |

### BJH method Desorption dV(d)

| Data Reduction Parameters |                       |                 |                       |
|---------------------------|-----------------------|-----------------|-----------------------|
| <b>t-Method</b>           | Calc. method: de Boer | Temperature     | 77.350K               |
| <b>BJH/DH method</b>      | Moving pt. avg.: off  | Cross Section:  | 16.200 Å <sup>2</sup> |
| <b>Adsorbate model</b>    | Nitrogen              | Liquid Density: | 0.808 g/cc            |
|                           | Molec. Wt.: 28.013    |                 |                       |

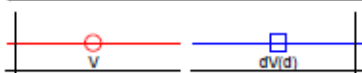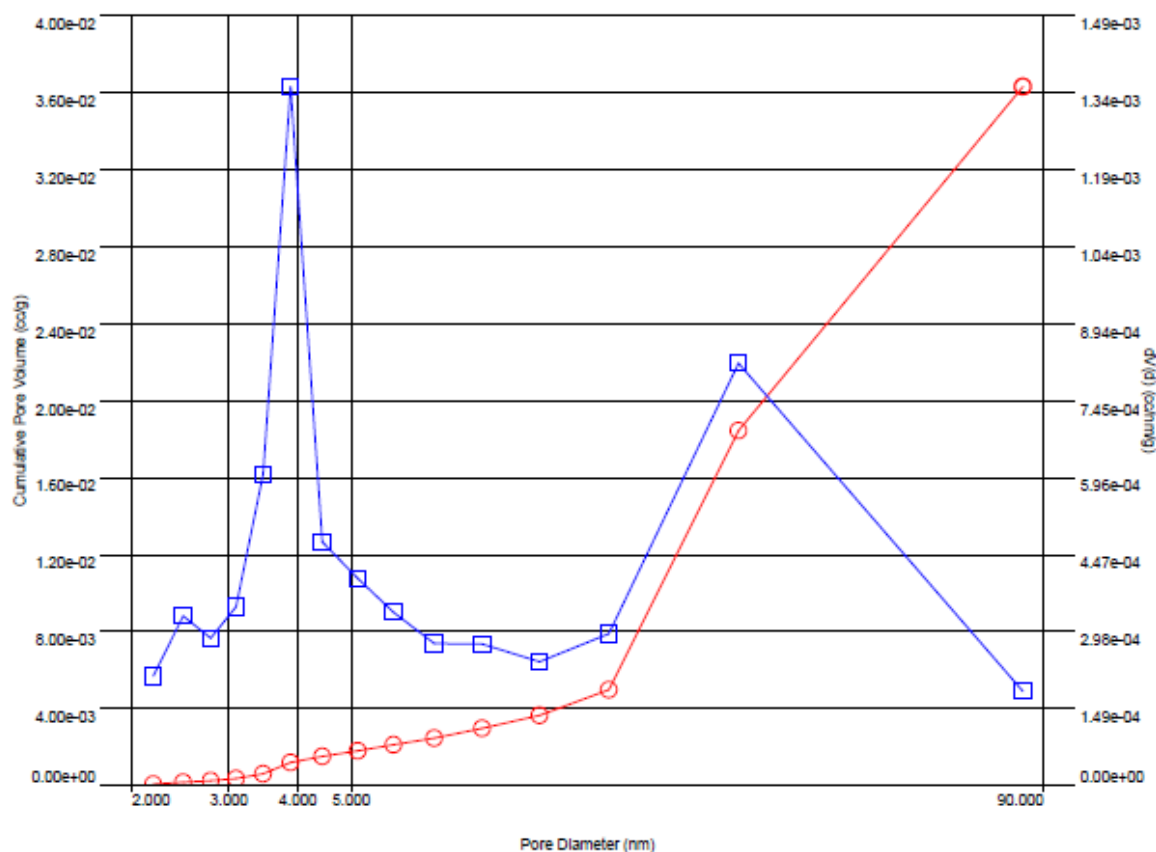

| BJH desorption summary |                         |
|------------------------|-------------------------|
| Surface Area =         | 6.199 m <sup>2</sup> /g |
| Pore Volume =          | 0.036 cc/g              |
| Pore Diameter Dv(d) =  | 3.882 nm                |



## S4. Melting Point of Synthesized Compound

**Table 1.** Melting point of ethyl 6-methyl-2-oxo-4-aryl-1,2,3,4-tetrahydropyrimidine-5-carboxylate (4a-n)

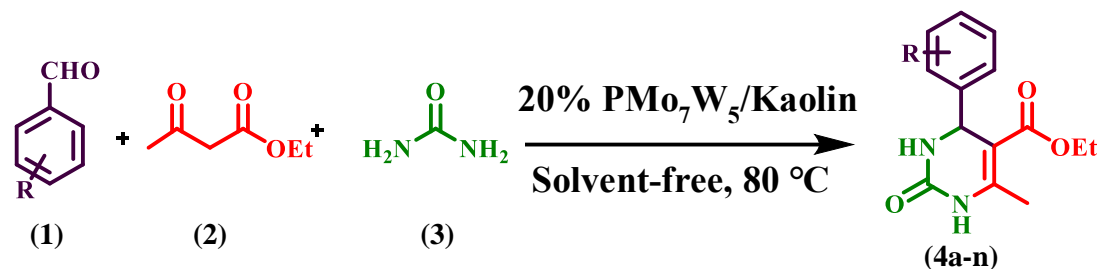

| Entry | Aldehydes                                               | Product | Melting points <sup>c</sup> (°C) <sup>Ref</sup> |
|-------|---------------------------------------------------------|---------|-------------------------------------------------|
| 4a    | C <sub>6</sub> H <sub>5</sub>                           |         | 201-203/201–203 <sup>1,2</sup>                  |
| 4b    | <i>p</i> -ClC <sub>6</sub> H <sub>4</sub>               |         | 210-212/212-215 <sup>3,4</sup>                  |
| 4c    | <i>m</i> -BrC <sub>6</sub> H <sub>4</sub>               |         | 185-187/183-185 <sup>5</sup>                    |
| 4d    | <i>p</i> -NO <sub>2</sub> C <sub>6</sub> H <sub>4</sub> |         | 198-200/208-209 <sup>6</sup>                    |
| 4e    | <i>p</i> -FC <sub>6</sub> H <sub>4</sub>                |         | 178-180/180-183 <sup>1,5</sup>                  |
| 4f    | <i>p</i> -OMeC <sub>6</sub> H <sub>4</sub>              |         | 200-201/201-203 <sup>3</sup>                    |

|           |                                                         |                                                                                     |                                |
|-----------|---------------------------------------------------------|-------------------------------------------------------------------------------------|--------------------------------|
| <b>4g</b> | <i>p</i> -MeC <sub>6</sub> H <sub>4</sub>               | 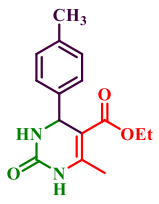   | 210-212/215-217 <sup>1</sup>   |
| <b>4h</b> | <i>p</i> -OHC <sub>6</sub> H <sub>4</sub>               |    | 225-227/224-226 <sup>1</sup>   |
| <b>4i</b> | <i>m</i> -NO <sub>2</sub> C <sub>6</sub> H <sub>4</sub> |    | 228-230/224-226 <sup>1,4</sup> |
| <b>4j</b> | <i>m</i> -ClC <sub>6</sub> H <sub>4</sub>               |    | 193-195/194-196 <sup>5</sup>   |
| <b>4k</b> | <i>o, p</i> -ClC <sub>6</sub> H <sub>4</sub>            |   | 248-250/ -                     |
| <b>4l</b> | <i>p</i> -BrC <sub>6</sub> H <sub>4</sub>               |  | 150-152/154-155 <sup>1</sup>   |
| <b>4m</b> | 2-Furyl                                                 |  | 205-207/205-206 <sup>4,5</sup> |
| <b>4n</b> | <i>o</i> -OHC <sub>6</sub> H <sub>4</sub>               |  | 202-204/199-200 <sup>1</sup>   |

<sup>a</sup>Reaction conditions: Aldehydes (1a-n) (3 mmol), ethyl acetoacetate (3 mmol), and urea (3.2 mmol) in 20% PMo<sub>7</sub>W<sub>5</sub>/Kaolin (0.1g) stirred at 80 °C; <sup>b</sup>isolated yields, <sup>c</sup>melting points are in good contact with those reported in the literature.

## S5. Spectral data of the compounds

### 4a. ethyl 6-methyl-2-oxo-4-phenyl-1,2,3,4-tetrahydropyrimidine-5-carboxylate

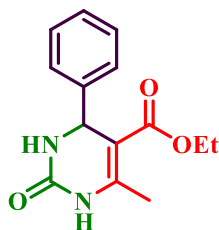

IR (ATR,  $\nu$   $\text{cm}^{-1}$ ): 694, 761, 1085, 1215, 1298, 1378, 1459, 1638, 1701, 2929, 2969, 3107, 3230.  $^1\text{H}$  NMR (400 MHz,  $\text{DMSO}-d_6$ )  $\delta$ ppm= 1.08 (t,  $J=7.1$  Hz, 3 H), 2.24 (s, 3 H), 3.97 (q,  $J=7.0$  Hz, 2 H), 5.14 (d,  $J=2.8$  Hz, 1 H), 7.19 - 7.27 (m, 3 H), 7.28 - 7.35 (m, 2 H), 7.73 (br. s., 1 H), 9.18 (s, 1 H).  $^{13}\text{C}$  NMR (100 MHz,  $\text{DMSO}-d_6$ )  $\delta$ ppm= 13.7 (s), 17.4 (s), 53.6 (s), 58.8 (s), 98.9 (s), 125.9 (s), 126.9 (s), 128.0 (s), 144.5 (s), 148.0 (s), 151.8 (s), 165.0 (s).

### 4b. ethyl 6-methyl-4-(4-Chlorophenyl)-2-oxo-1,2,3,4-tetrahydropyrimidine-5-carboxylate

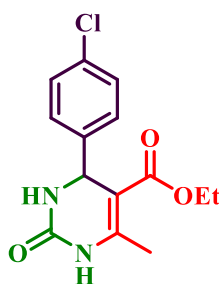

IR (ATR,  $\nu$   $\text{cm}^{-1}$ ): 676, 775, 1010, 1085, 1217, 1285, 1419, 1456, 1640, 1707, 2964, 3110, 3235, 3332.  $^1\text{H}$  NMR ( $\text{CDCl}_3$ , 400MHz): 1.17(t,  $J = 7.1$  Hz, 3H), 2.33 (s, 3H), 4.07 (q, 2H), 5.37 (d,  $J = 2.6$  Hz, 1H), 5.96 (br. s., 1H), 7.21-7.31 (m, 4H), 8.19 (s, 1H).  $^{13}\text{C}$  NMR ( $\text{CDCl}_3$ , 100 MHz): 14.1 (s), 18.7 (s), 55.1 (s), 60.1 (s), 101.1 (s), 128.0 (s), 128.9 (s), 133.7 (s), 142.2 (s), 146.5 (s), 153.3 (s), 165.4 (s).

### 4d. ethyl 6-methyl-4-(4-nitrophenyl)-2-oxo-1,2,3,4-tetrahydropyrimidine-5-carboxylate

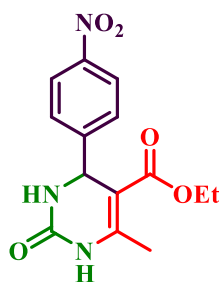

IR (ATR,  $\nu$   $\text{cm}^{-1}$ ): 690, 775, 857, 1087, 1211, 1297, 1347, 1385, 1460, 1517, 1638, 1701, 2979, 3110, 3230.  $^1\text{H}$  NMR (400 MHz,  $\text{DMSO}-d_6$ )  $\delta$ ppm= 1.09 (t,  $J=7.1$  Hz, 3 H), 2.26 (s, 3 H), 3.98

(q, J=7.1 Hz, 2 H), 5.27 (d, J=3.4 Hz, 1 H), 7.46 - 7.56 (m, 2 H), 7.85 - 7.96 (m, 1 H), 8.18 - 8.30 (m, 2 H), 9.32 - 9.42 (m, 1 H). <sup>13</sup>C NMR (100 MHz, DMSO- $\delta$ 6)  $\delta$ ppm= 13.6 (s), 17.5 (s), 53.3 (s), 59.0 (s), 97.7 (s), 123.4 (s), 127.2 (s), 146.3 (s), 149.0 (s), 151.3 (s), 151.6 (s), 164.6 (s).

**4e. ethyl 4-(4-fluorophenyl)-6-methyl-2-oxo-1,2,3,4-tetrahydropyrimidine-5-carboxylate**

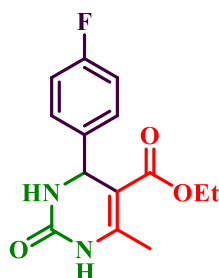

IR (ATR,  $\nu$   $\text{cm}^{-1}$ ): 945, 1083, 1157, 1215, 1283, 1451, 1602, 3220, 3349. <sup>1</sup>H NMR (400 MHz, DMSO-  $\delta$ 6)  $\delta$ ppm= 1.08 (t, J=7.1 Hz, 3 H), 2.25 (s, 3 H), 3.97 (q, J=6.8 Hz, 2 H), 5.15 (d, J=2.5 Hz, 1 H), 7.14 (t, J=8.8 Hz, 2 H), 7.26 (dd, J=8.4, 5.6 Hz, 2 H), 7.78 (br. s., 1 H), 9.28 (br. s., 1 H). <sup>13</sup>C NMR (100 MHz, DMSO-  $\delta$ 6)  $\delta$ ppm =13.9 (s), 17.6 (s), 53.2 (s), 59.1 (s), 99.0 (s), 114.9 (s), 115.1 (s), 128.1 (s), 128.1 (s), 140.9 (s), 141.0 (s), 148.4 (s), 151.9 (s), 159.6 (s), 160.0 (s), 162.4 (s), 165.1 (s)

**4l. ethyl 4-(4-bromophenyl)-6-methyl-2-oxo-1,2,3,4-tetrahydropyrimidine-5-carboxylate**

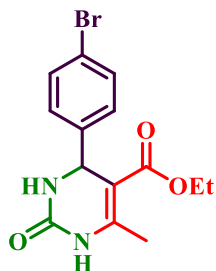

IR (ATR,  $\nu$   $\text{cm}^{-1}$ ): 662, 763, 851, 1014, 1079, 1161, 1213, 1283, 1381, 1450, 1630, 2981, 3214, 3342. <sup>1</sup>H NMR (400 MHz, DMSO-  $\delta$ 6)  $\delta$ ppm = 1.09 (t, J=7.1 Hz, 3 H), 2.25 (s, 3 H), 3.98 (q, J=7.1 Hz, 2 H), 5.13 (d, J=3.1 Hz, 1 H), 7.19 (m, J=8.4 Hz, 2 H), 7.48 - 7.57 (m, 2 H), 7.78 (br. s., 1 H), 9.27 (s, 1 H). <sup>13</sup>C NMR (100 MHz, DMSO-  $\delta$ 6)  $\delta$ ppm =13.9 (s), 17.6 (s), 53.3 (s), 59.1 (s), 98.6 (s), 120.1 (s), 128.4 (s), 131.1 (s), 144.0 (s), 148.5 (s), 151.8 (s), 159.5 (s), 165.0 (s)

## S6. FT-IR, $^1\text{H}$ and $^{13}\text{C}$ NMR spectra of the compounds

### 4a. ethyl 6-methyl-2-oxo-4-phenyl-1,2,3,4-tetrahydropyrimidine-5-carboxylate

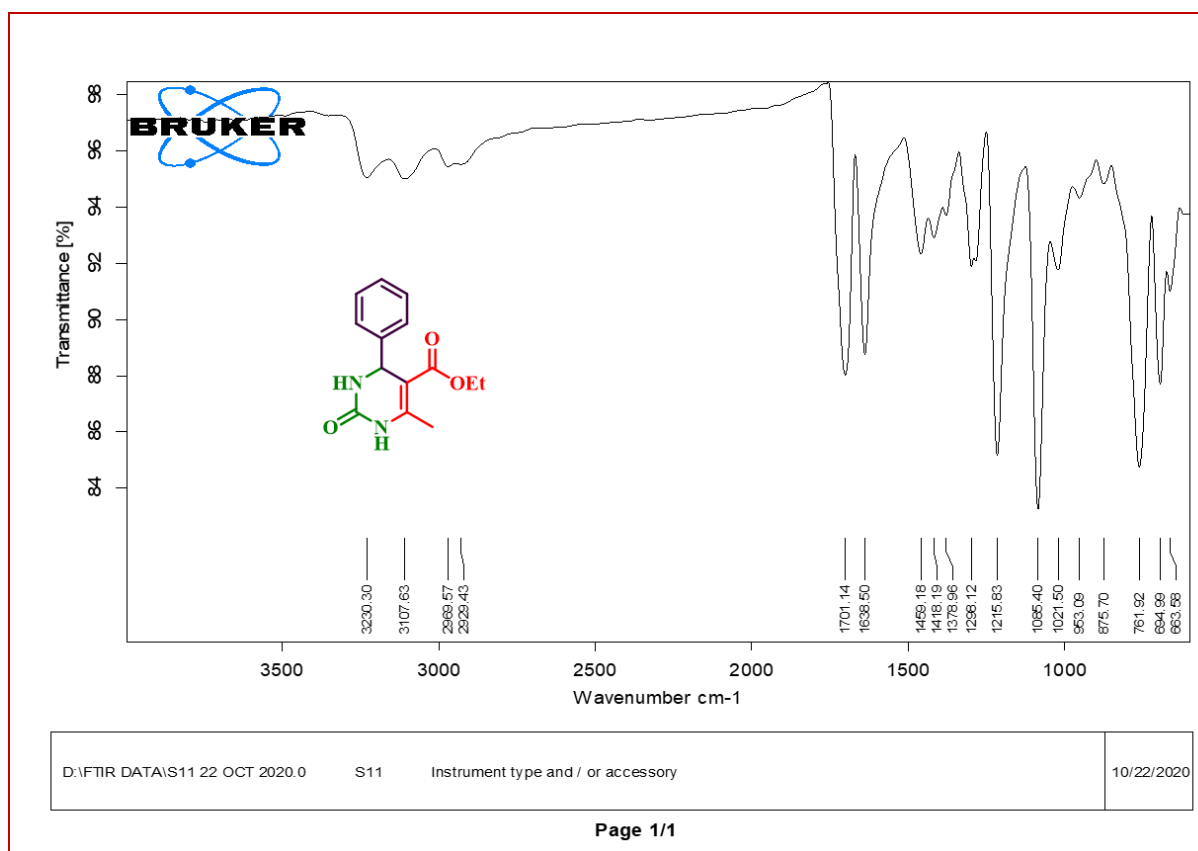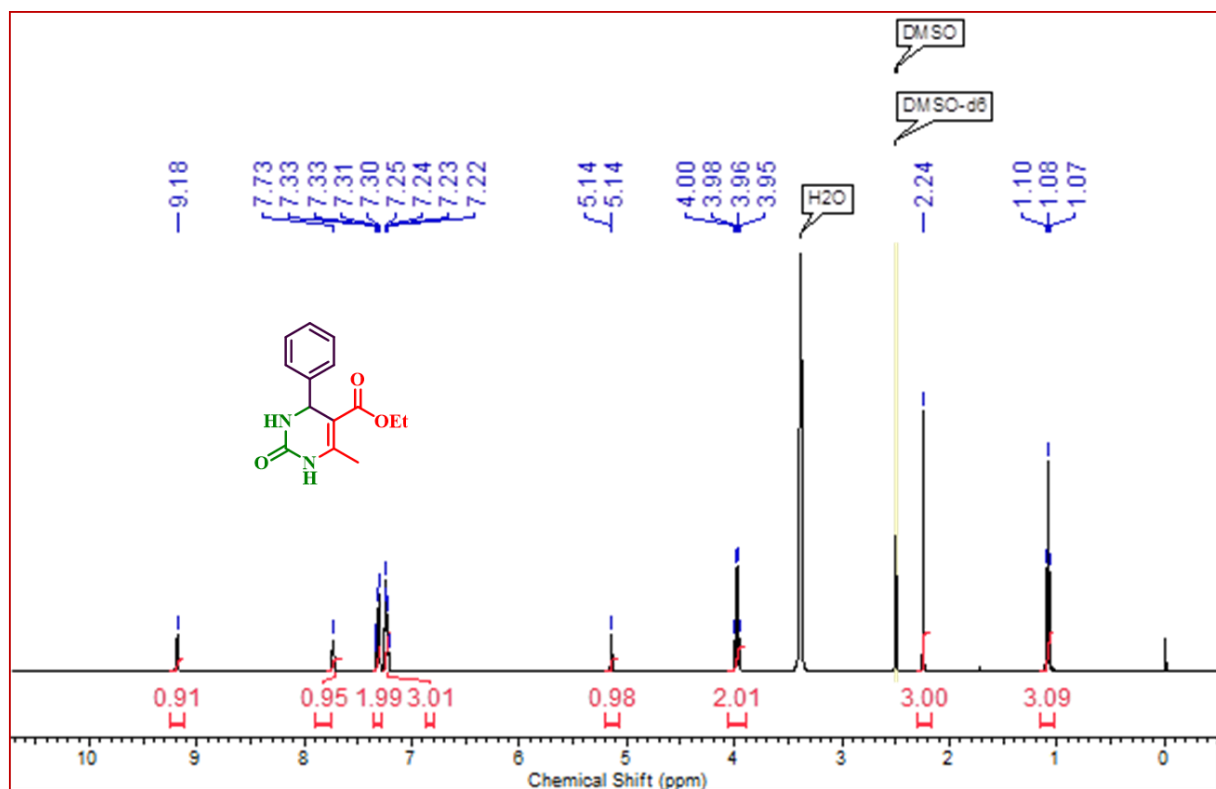

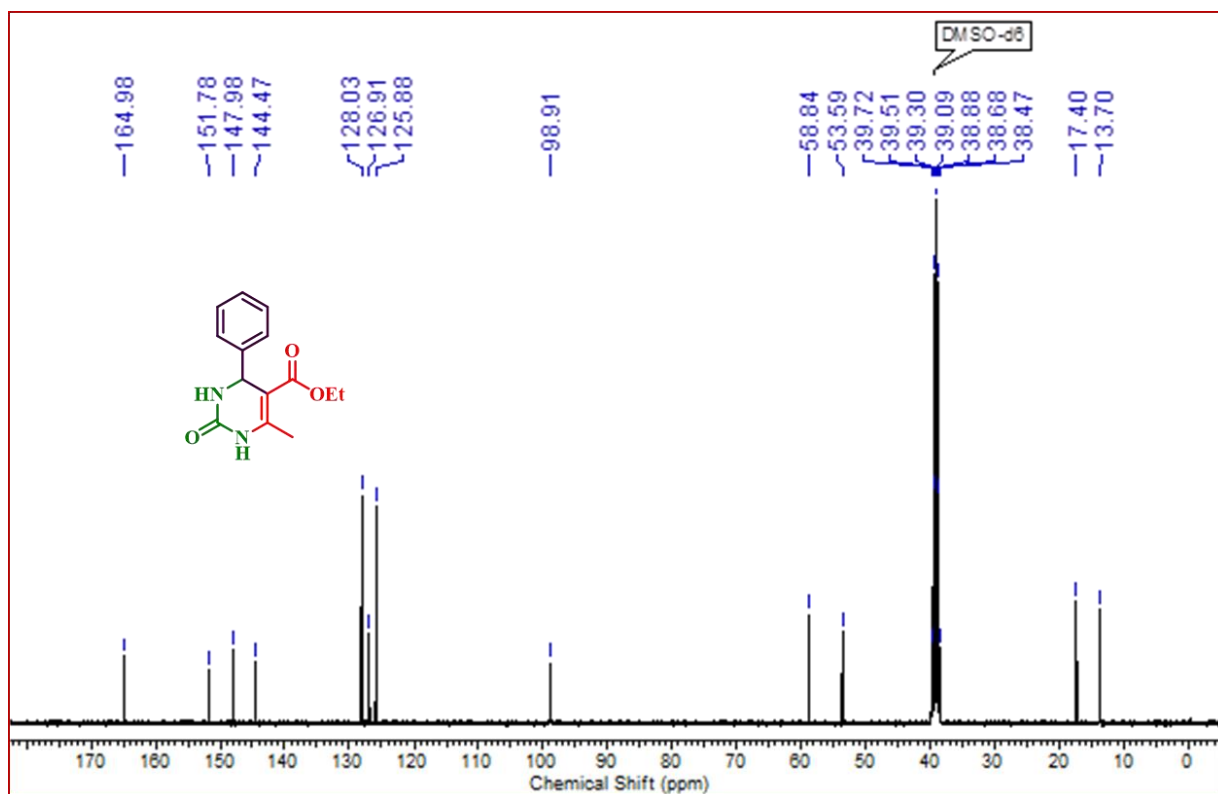

**4b. ethyl 6-methyl-4-(4-Chlorophenyl)-2-oxo-1,2,3,4-tetrahydropyrimidine-5-carboxylate**

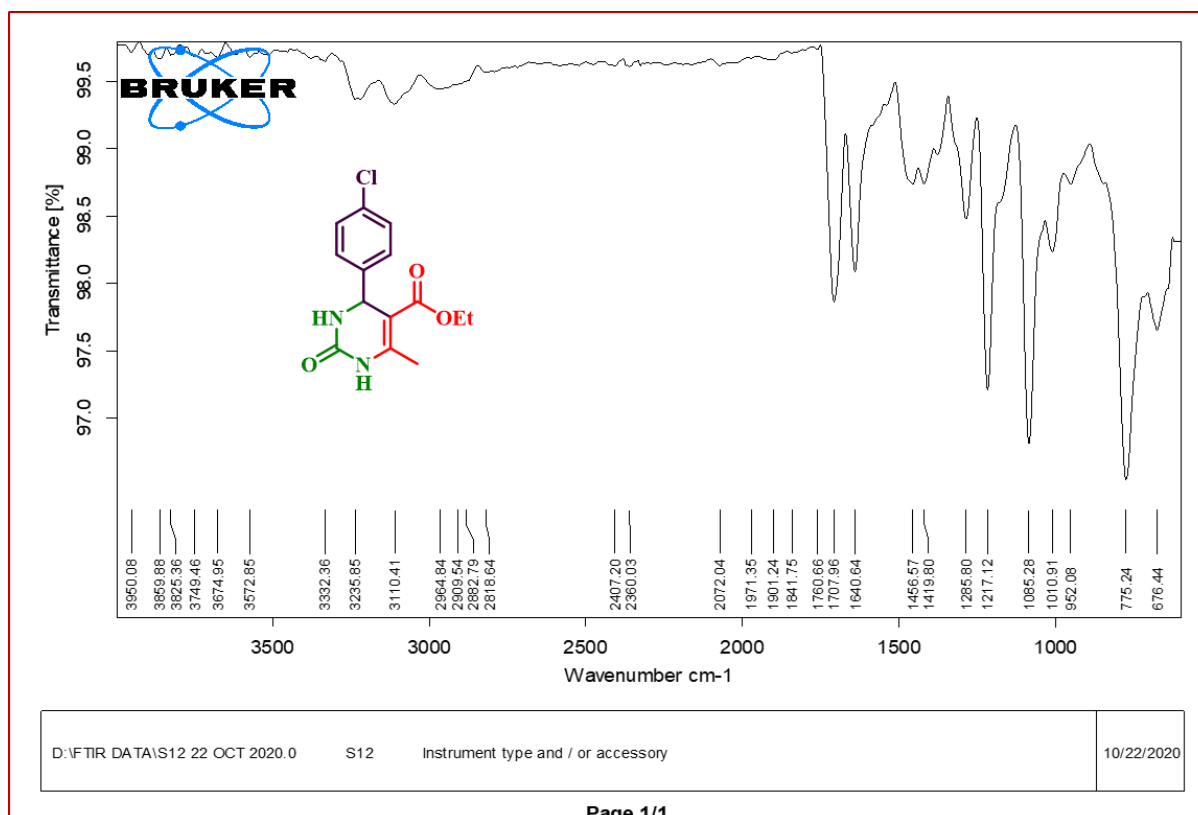

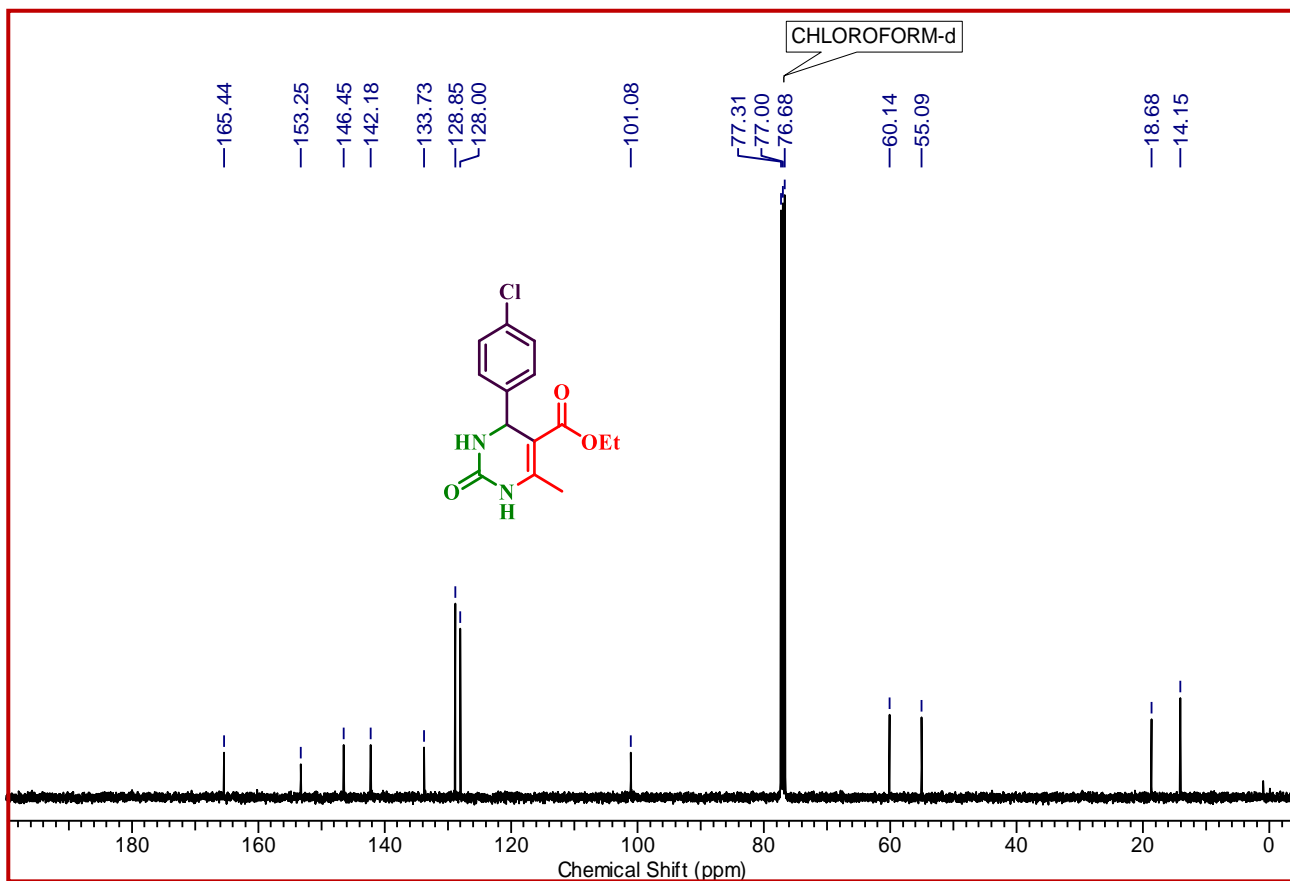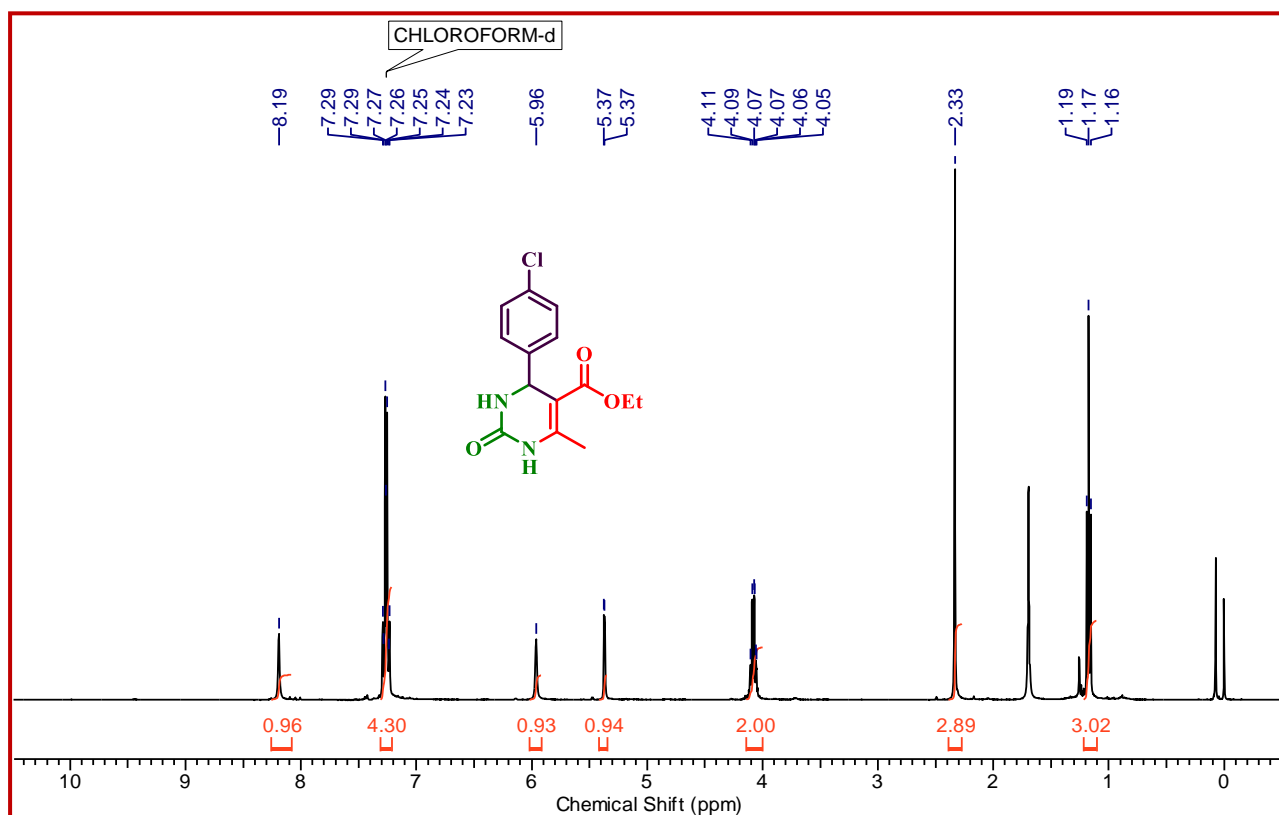

4d. ethyl 6-methyl-4-(4-nitrophenyl)-2-oxo-1,2,3,4-tetrahydropyrimidine-5-carboxylate

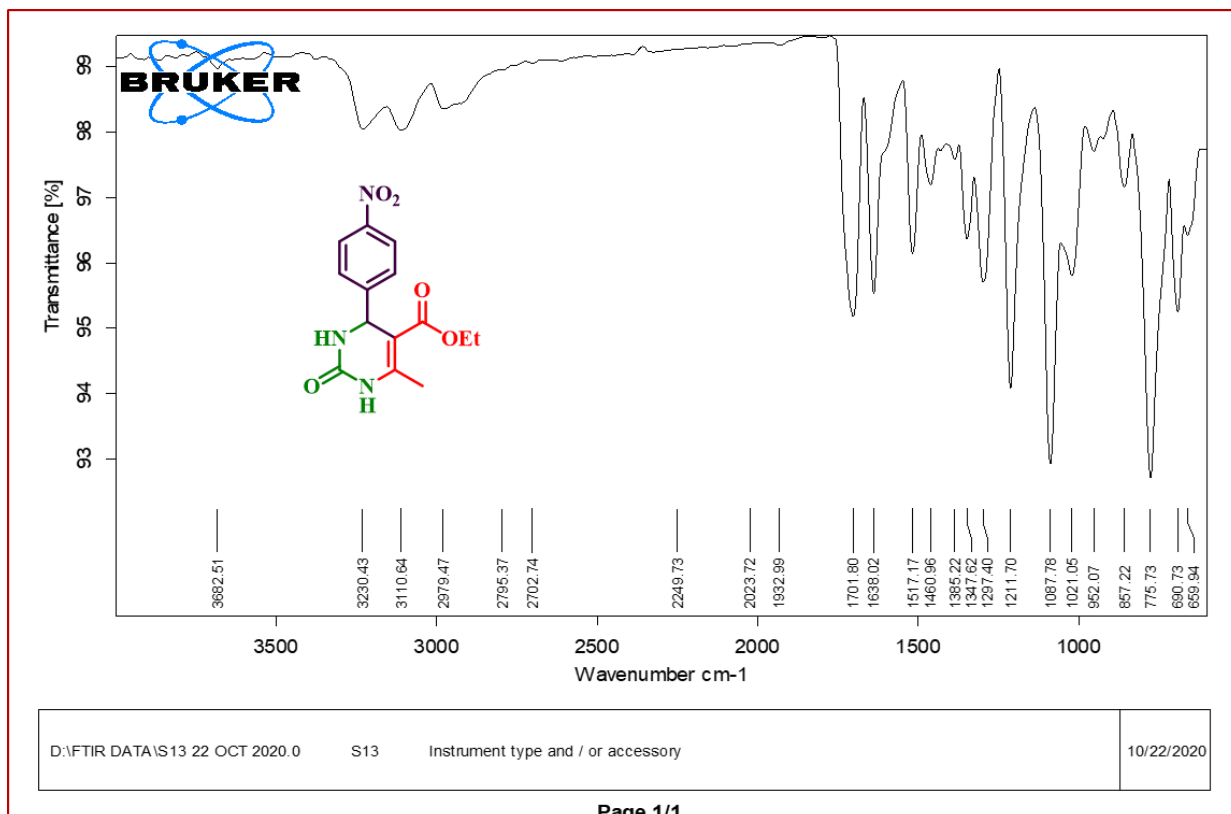

Page 1/1

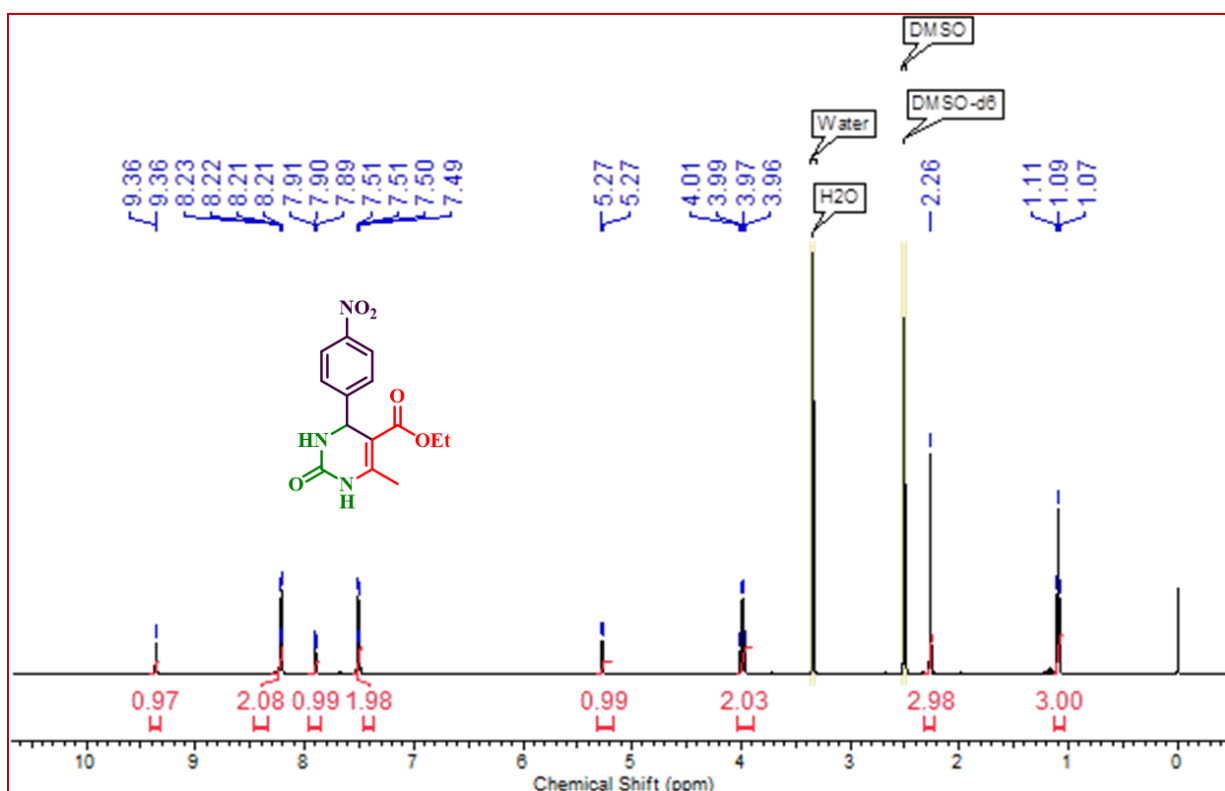



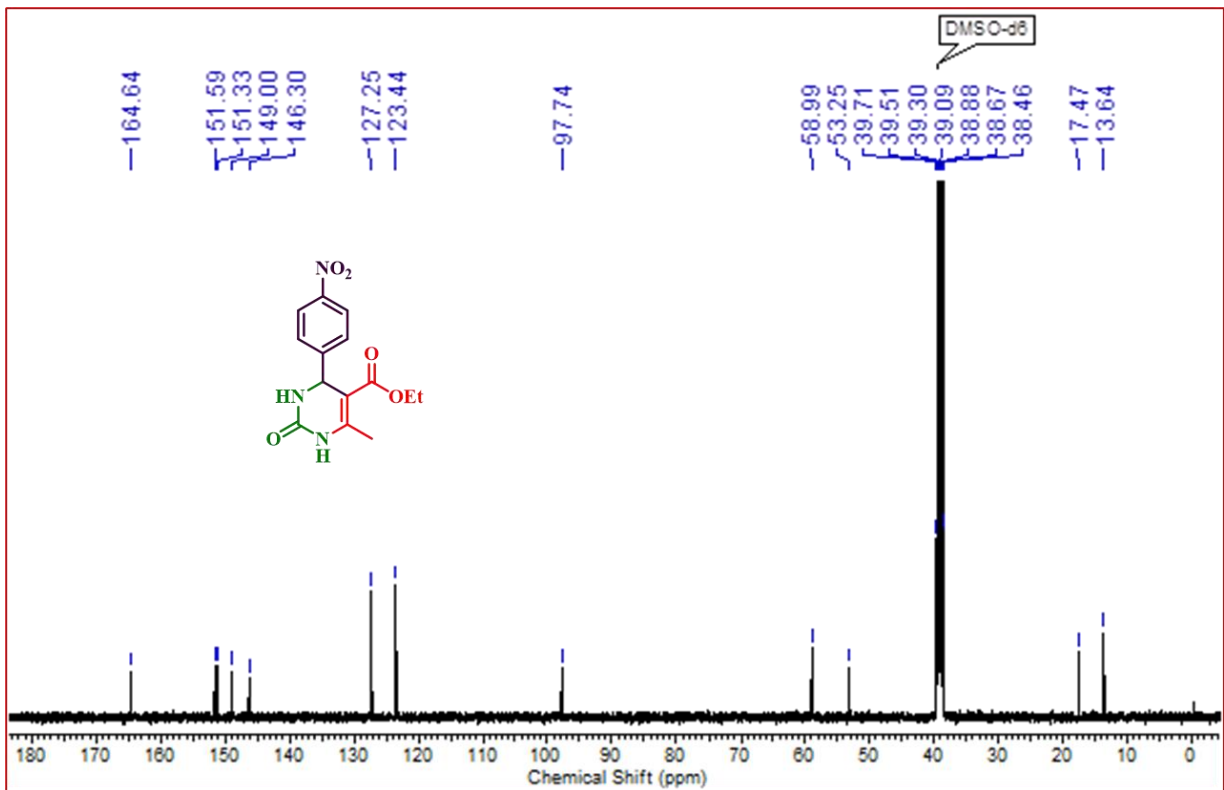

4e. ethyl 4-(4-fluorophenyl)-6-methyl-2-oxo-1,2,3,4-tetrahydropyrimidine-5-carboxylat

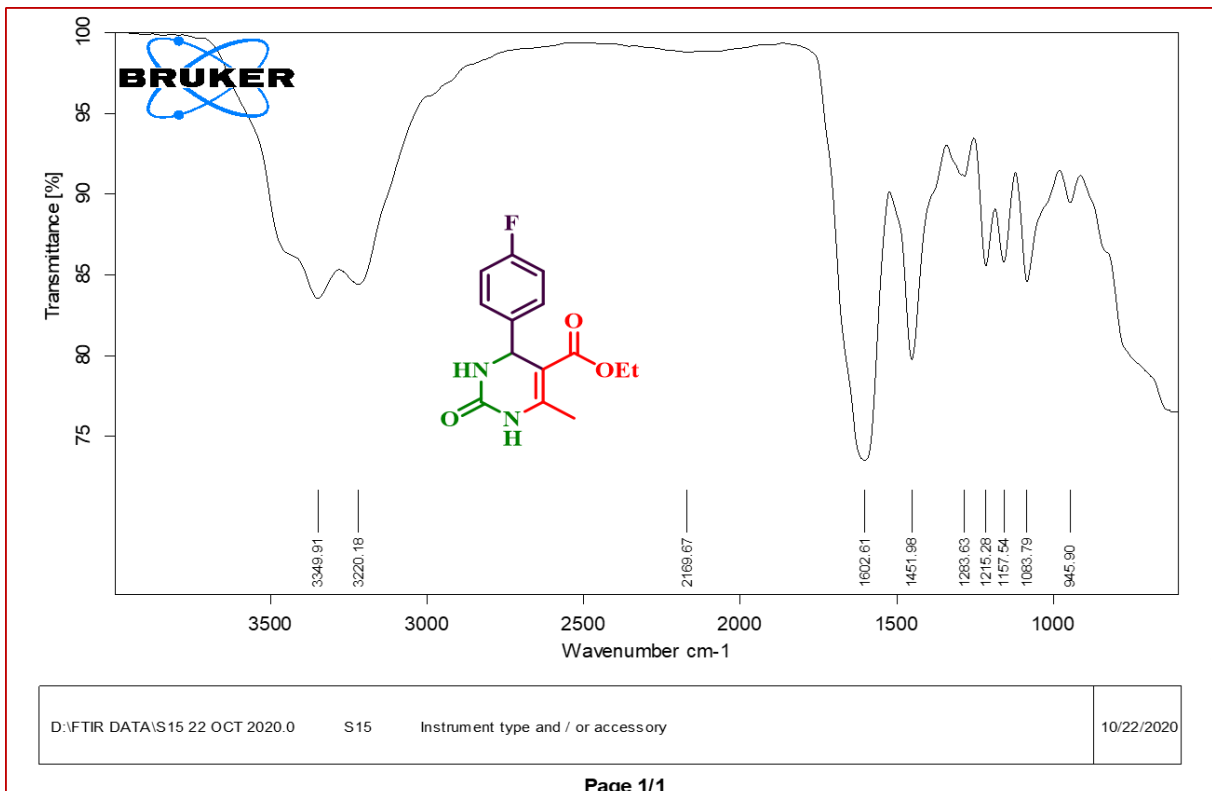

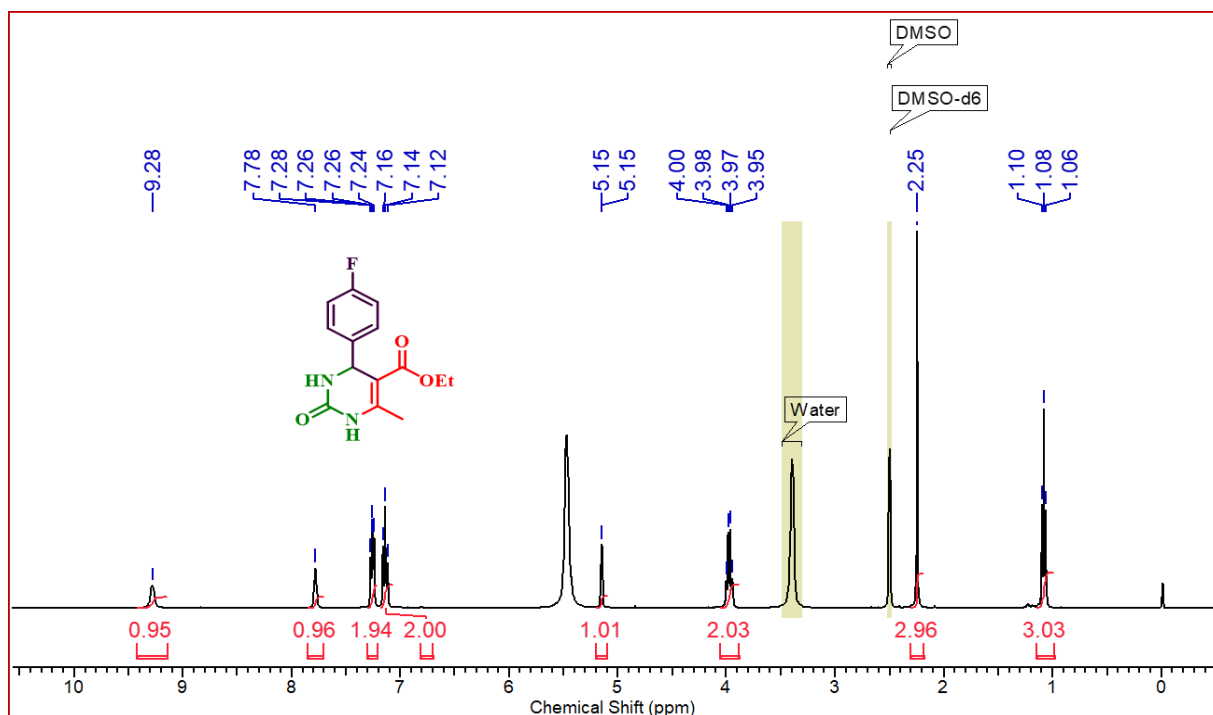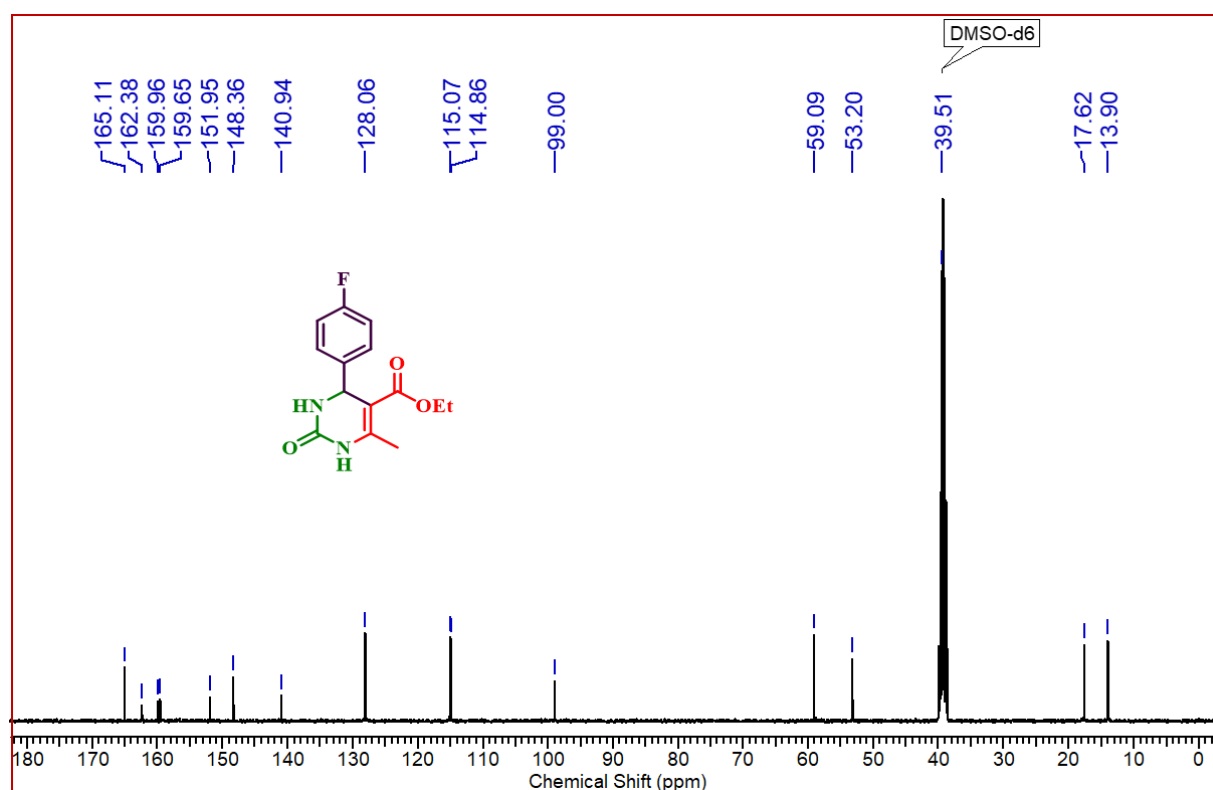

**4l. ethyl 4-(4-bromophenyl)-6-methyl-2-oxo-1,2,3,4-tetrahydropyrimidine-5-carboxylate**

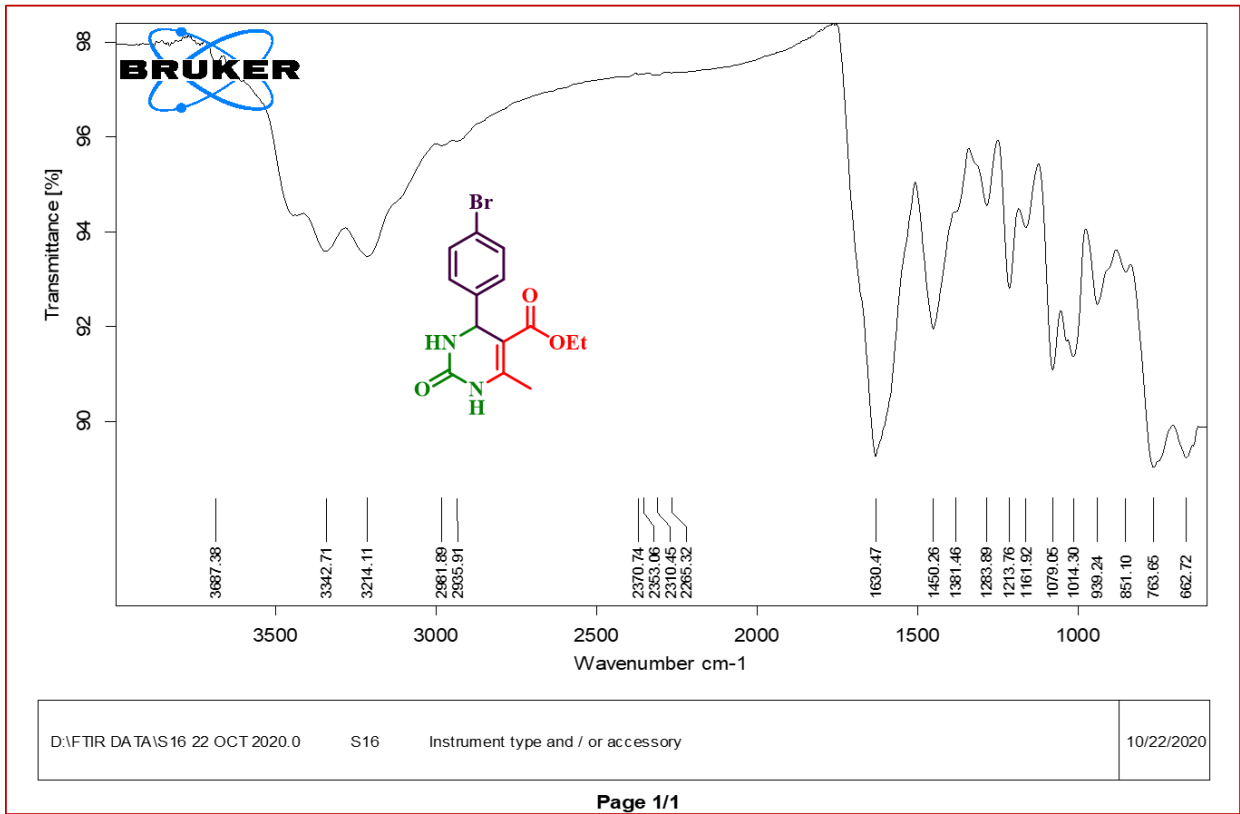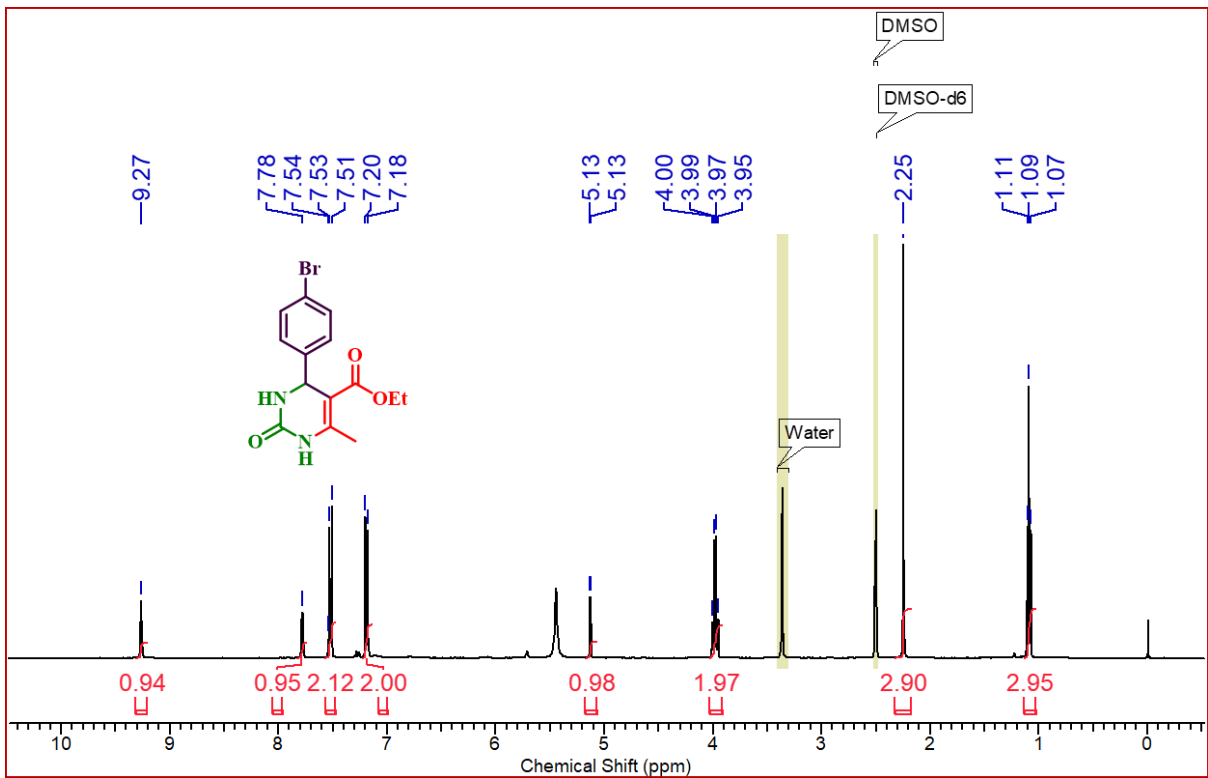

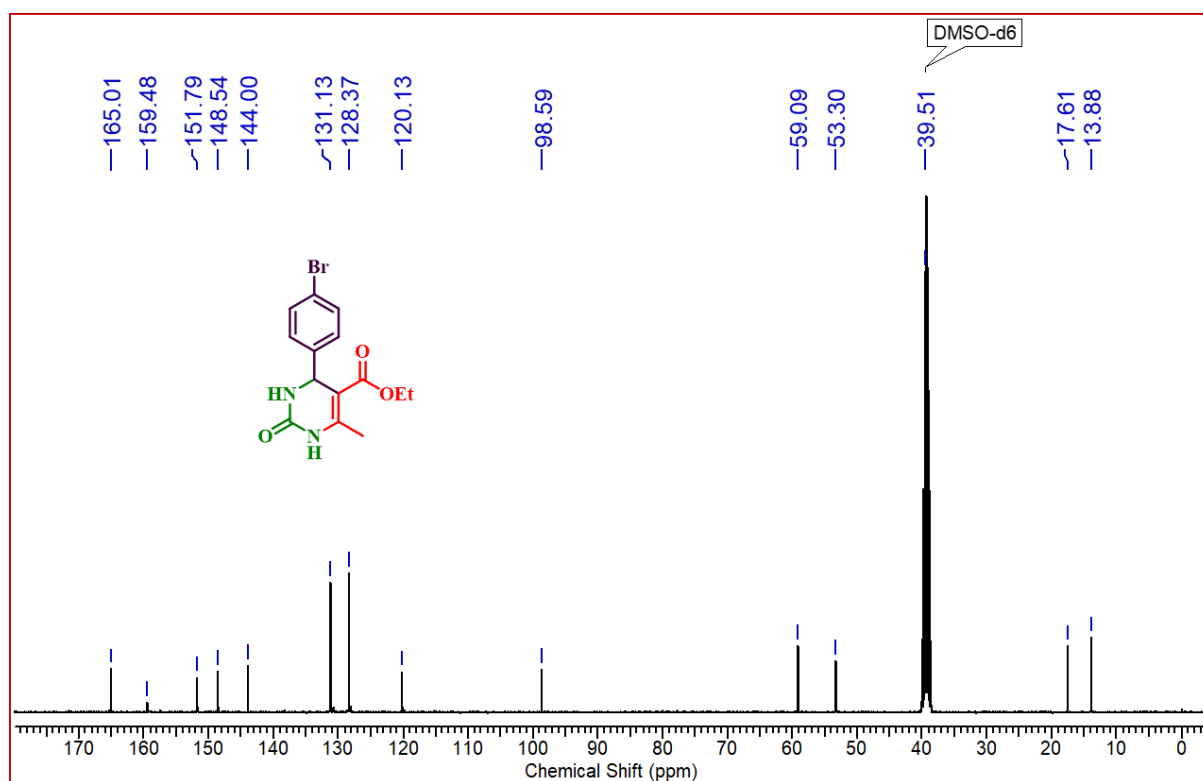

## References

- 1 J. Safaei Ghomi, R. Teymuri and A. Ziarati, *Monatsh Chem*, 2013, **144**, 1865–1870.
- 2 R. J. Kalbasi, A. R. Massah and B. Daneshvarnejad, *Appl. Clay Sci.*, 2012, **55**, 1–9.
- 3 Q. Wang and W. Pei, *J. Iran. Chem. Soc*, 2010, **7**, 318–321.
- 4 M. M. Heravi, F. Derikvand and F. F. Bamoharram, *J. Mol. Catal. A Chem.*, 2005, **242**, 173–175.
- 5 Y. Zhang, B. Wang, X. Zhang, J. Huang and C. Liu, *Molecules*, 2015, **20**, 3811–3820.
- 6 J. Mondal, T. Sen and A. Bhaumik, *Dalton Trans.*, 2012, **41**, 6173.
